# Supplementary material for: A dual-mechanism antibiotic targets Gram-negative bacteria and avoids drug resistance
Source: bioRxiv or medRxiv preprint supplement (doi:10.1101/2020.03.12.984229), 2020-03-13

## Supplementary Materials

**Supplementary Table 1: Bacterial Strains and Growth Media**

| <b>Strain</b>                | <b>Growth Media</b>                     |
|------------------------------|-----------------------------------------|
| <i>B. cepecia</i>            | Cation-adjusted Mueller-Hinton Broth II |
| <i>E. coli</i> WT BW25113    | Luria Broth                             |
| <i>E. coli</i> CFT073        | Luria Broth                             |
| <i>C. difficile</i>          | Reinforced Clostridial Medium           |
| <i>P. acnes</i>              | Reinforced Clostridial Medium           |
| <i>H. influenza</i>          | Cation-adjusted Mueller-Hinton Broth II |
| <i>V. cholerae</i>           | Luria Broth                             |
| <i>A. baumannii</i> AB17978  | Luria Broth                             |
| <i>A. baumannii</i> AB5075   | Luria Broth                             |
| <i>E. coli</i> UPEC CFT073   | Gutnick Minimal Media                   |
| <i>E. coli</i> UPEC J96      | Gutnick Minimal Media                   |
| <i>E. coli</i> BW25113       | Gutnick Minimal Media                   |
| <i>E. coli</i> NCM3722       | Gutnick Minimal Media                   |
| <i>S. aureus</i> MRSA COL    | Luria Broth                             |
| <i>S. aureus</i> MRSA USA300 | Luria Broth                             |
| <i>M. fortuitum</i>          | Cation-adjusted Mueller-Hinton Broth II |
| <i>N. gonorrhoeae</i>        | Cation-adjusted Mueller-Hinton Broth II |
| <i>S. aureus</i> VanA        | Cation-adjusted Mueller-Hinton Broth II |
| <i>S. aureus</i> VISA        | Cation-adjusted Mueller-Hinton Broth II |
| <i>S. aureus</i> MRSE        | Cation-adjusted Mueller-Hinton Broth II |
| <i>S. epidermidis</i>        | Cation-adjusted Mueller-Hinton Broth II |
| <i>B. subtilis</i> W168      | Luria Broth                             |
| <i>E. coli</i> IptD4213      | Luria Broth                             |
| <i>E. faecium</i>            | Cation-adjusted Mueller-Hinton Broth II |

|                      |                                                                  |
|----------------------|------------------------------------------------------------------|
| <i>S. pneumoniae</i> | Cation-adjusted Muller-Hinton Broth II with 5% lysed horse blood |
|----------------------|------------------------------------------------------------------|

### Supplementary Table 2: The 14 features evaluated in BCP analysis

| Features of BCP Analysis  |
|---------------------------|
| Cell Area                 |
| Cell Length               |
| Cell Width                |
| Cell Eccentricity         |
| Cell Perimeter            |
| Nucleoid Area             |
| Ratio of Nucleoid to Cell |
| Nucleoid Eccentricity     |
| DNA Length                |
| DNA Width                 |
| DNA Perimeter             |
| Mean Sytox intensity      |
| Mean FM4-64 intensity     |
| Mean Dapi intensity       |

### Supplementary Figure Legends

**Figure S1. SCH-79797 is bactericidal against *S. aureus*.** Colony forming units (CFU ml<sup>-1</sup>) after 3-hour treatment of *S. aureus* MRSA USA300 with 1% DMSO, 1X MIC SCH-79797 and 5X MIC novobiocin. Each data point represents 3 independent samples and 3 technical replicates. Mean ± s.d. are shown.

**Figure S2. SCH-79797 is an effective antibiotic in an infection model of *G. mellonella* by *A. baumannii*.** A-B. The percent survival of non-infected *G. mellonella* wax worms after treatment with 2µl/larva of 100% DMSO, 67µg/larva SCH-79797, 6µg/larva gentamicin, and

67µg/larva rifampicin. Data in (A) represents a typical cohort (n = 12) from a biological triplicate and the pooled results are presented in (B). Mantel-cox statistics for the cohort were calculated with PRISM. C. The percent survival of *A. baumannii* infected *G. mellonella* wax worms after treatment with 67µg/larva SCH-79797, 6µg/larva gentamicin, and 67µg/larva rifampicin. Data represents the pooled results from a biological triplicate. D. The average survival of drug-treated *A. baumannii* infected *G. mellonella* wax worms relative to larvae treated with DMSO. Data represents the pooled results from a biological triplicate.

**Figure S3. SCH-79797 is not prone to resistance in both *S. aureus* and *A. baumannii*.** A. Fold increase in resistance of *S. aureus* MRSA USA300 to SCH-79797, novobiocin, trimethoprim, and nisin after 25 days of serial passaging in 0.5X MIC of each drug and plotted on a log<sub>2</sub> scale. Resistance was confirmed by remeasuring MIC's from aliquots of each passage that were collected and stored at -80°C. B. Fold increase in resistance of *A. baumannii* AB17978 to SCH-79797 and gentamicin after 5 days of serial passaging in 0.5X MIC of each drug and plotted on a log<sub>2</sub> scale. Resistance was confirmed as described above. The experiment was performed in duplicate and identical results were found in both cases.

**Figure S4. Thermal stability of DHFR increases after SCH-79797 and Trimethoprim treatment.** A-B. The relative thermal stability of DHFR after treatment of whole cell and cell lysate samples with (A) SCH-79797 and (B) trimethoprim. Changes in thermal stability were determined by measuring changes in the abundance of DHFR across 10 different temperatures ranging from 42-72°C and 4 drug concentrations and a vehicle control.

**Figure S5. CRISPRi mutants not involved in folate metabolism are not sensitized to SCH-79797.** A. The growth of CRISPRi *B. subtilis* knockdown mutants relative to a DMSO-treated control after SCH-79797 treatment. Bacterial growth was measured for 14h and the final optical density (OD<sub>600</sub>) of each condition was plotted against drug concentration. Each data point represents 2 independent replicates. Mean ± s.d. are shown.

**Figure S6. Treatment with ampicillin, rifampicin, and novobiocin does not disrupt membrane integrity.** A. Flow cytometry analysis of the membrane potential and permeability of *E. coli* IptD4213 cells after 15 min. incubation with 2X MIC ampicillin, rifampicin, novobiocin.

**Figure S7. SCH-79797 disrupts *B. subtilis* W168 membrane integrity.** A. Flow cytometry analysis of the membrane potential and permeability of *B. subtilis* W168 cells after 15 min. incubation with 1% DMSO, 1X MIC SCH-79797, 2X MIC SCH-79797.

# Supplementary Figure 1

A

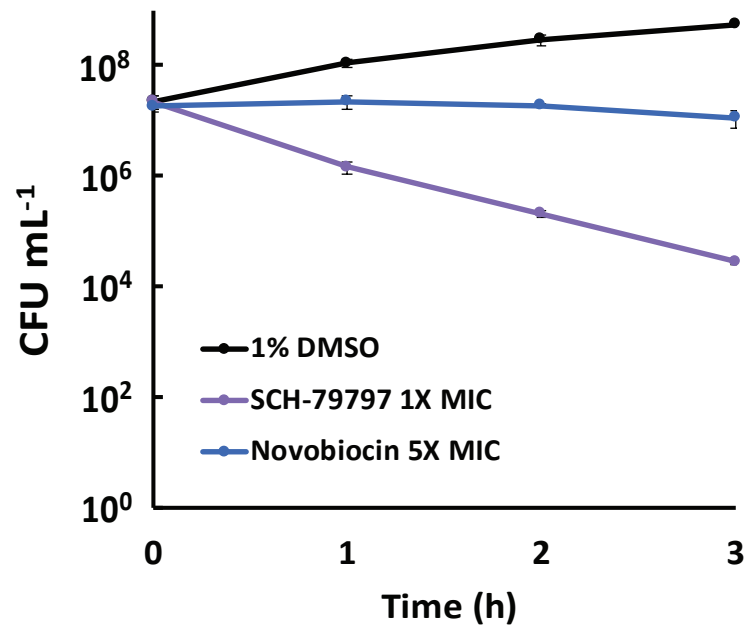

# Supplementary Figure 2

**A**

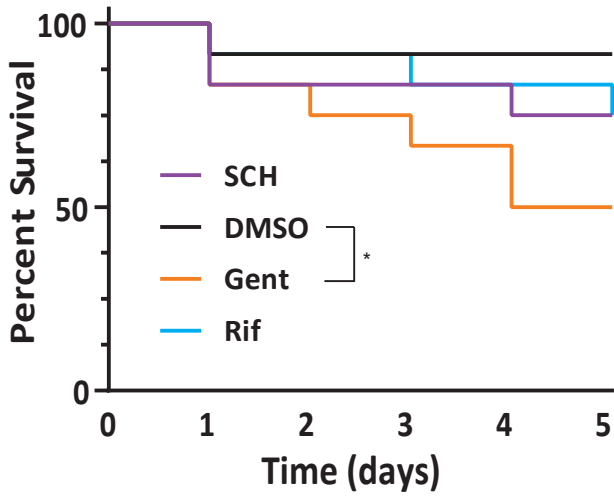

**B**

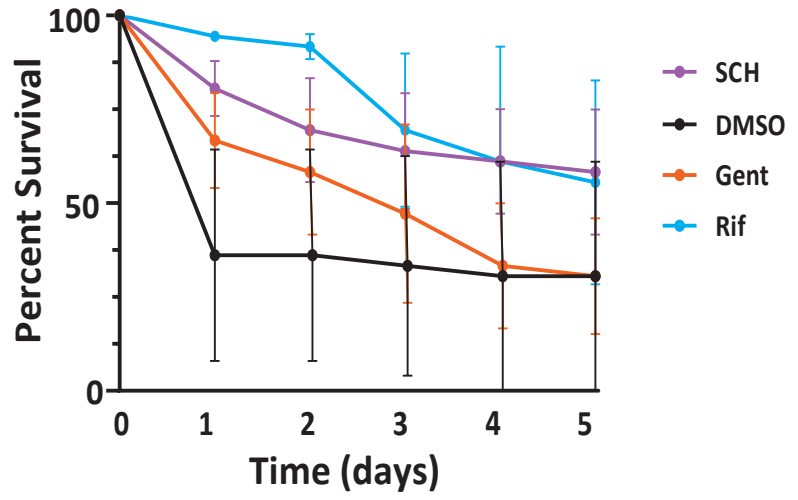

**C**

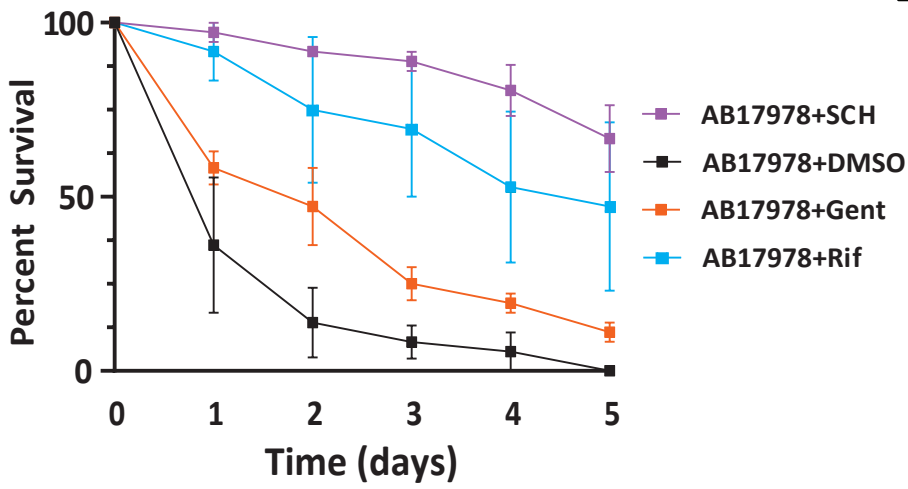

**D**

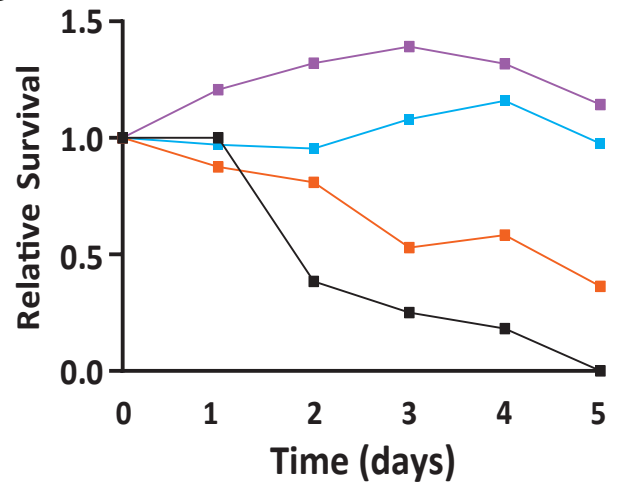

### Supplementary Figure 3

**A**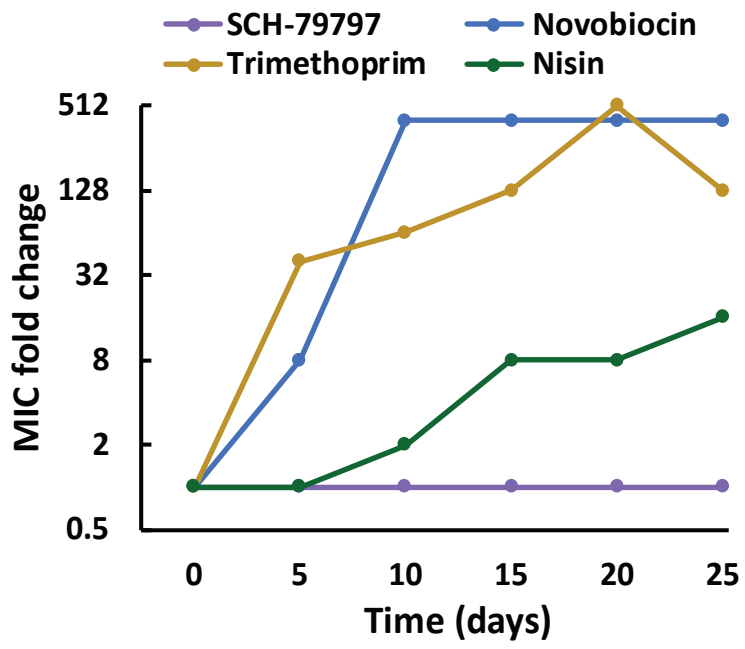**B**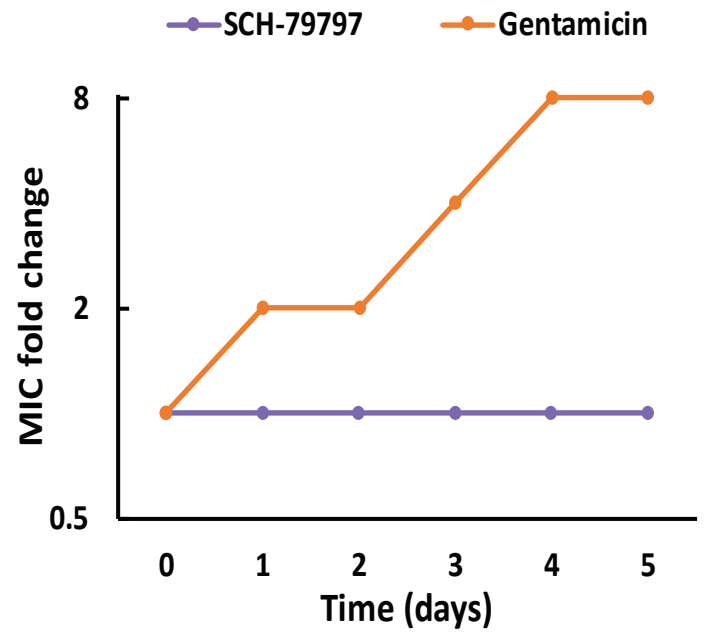

# Supplementary Figure 4

**A****SCH-79797 Lysate Treatment**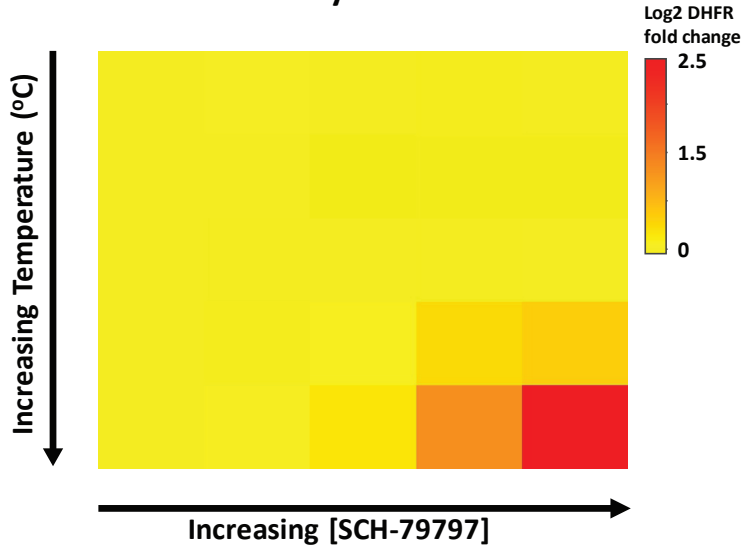**SCH-79797 Whole Cell Treatment**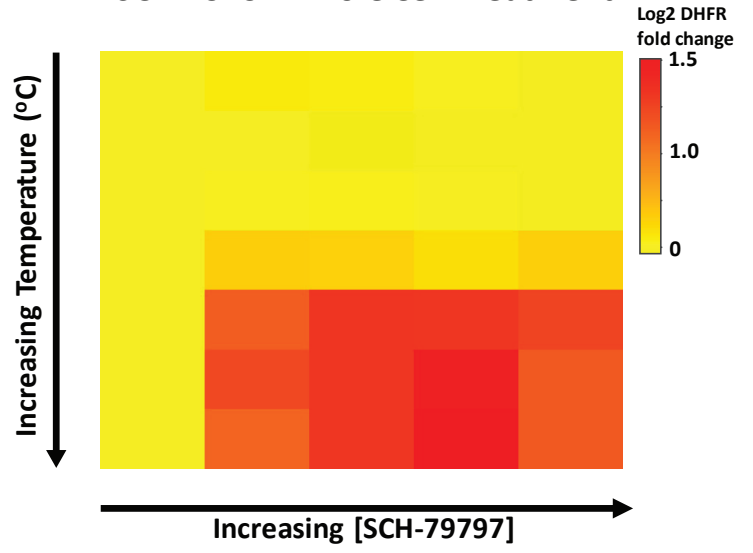**B****Trimethoprim Lysate Treatment**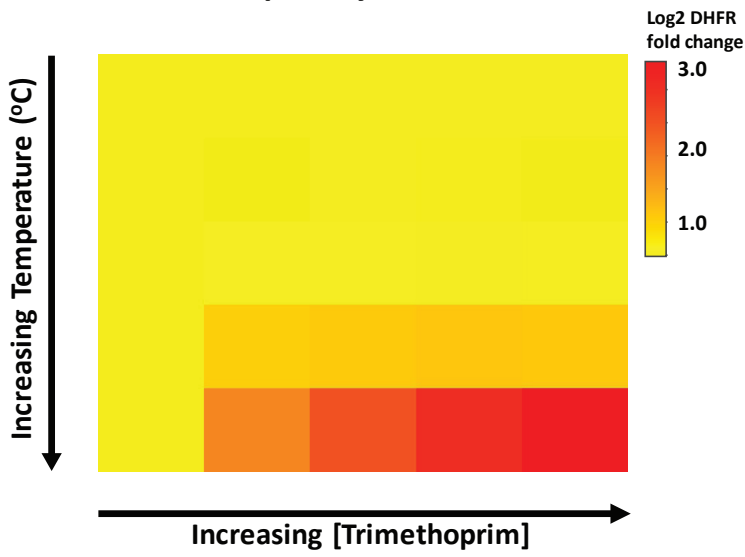**Trimethoprim Whole Cell Treatment**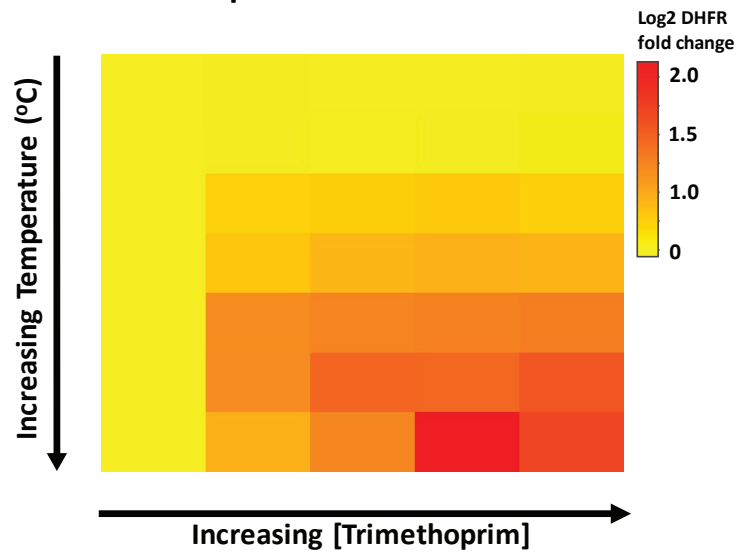



Supplementary Figure 5

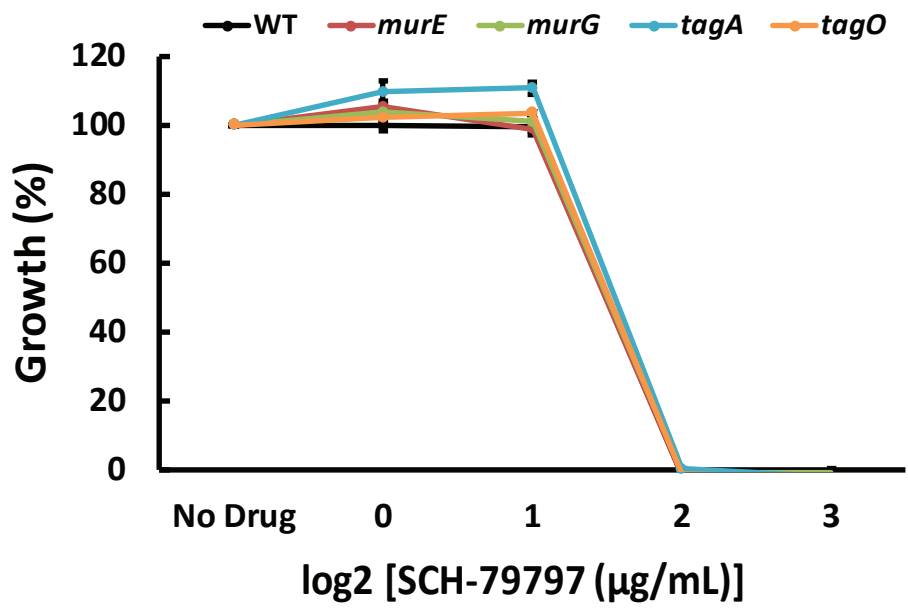

# Supplementary Figure 6

## Ampicillin 2X MIC

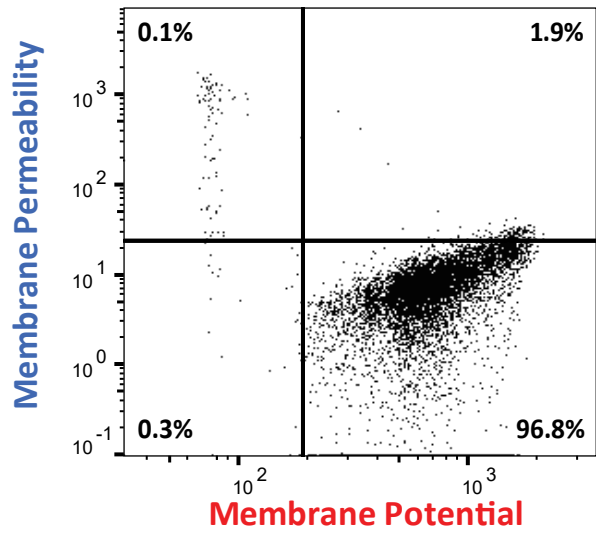

## Rifampicin 2X MIC

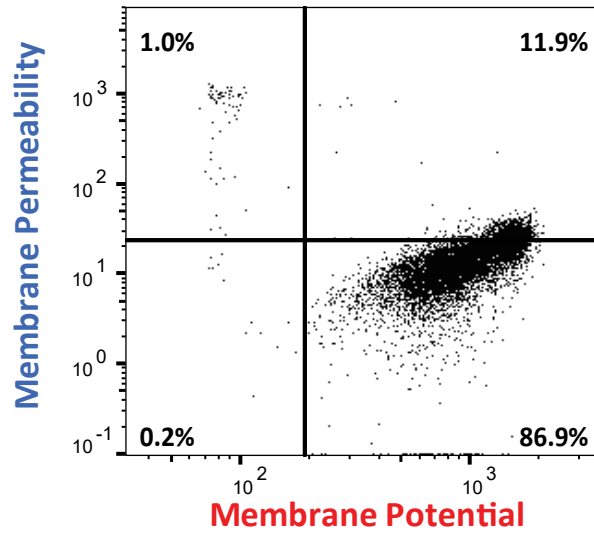

## Novobiocin 2X MIC

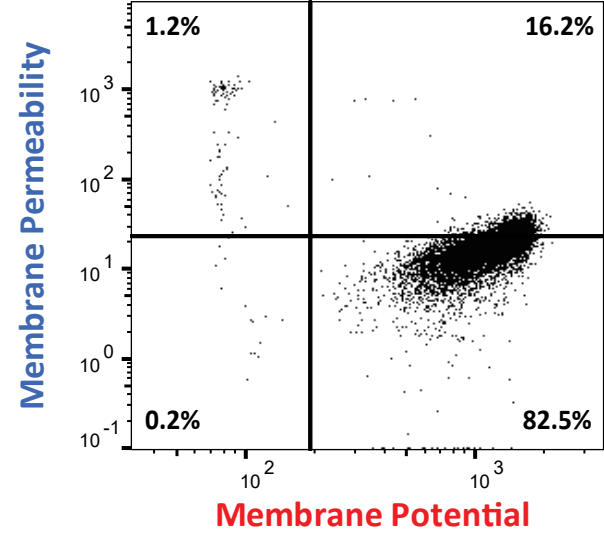

# Supplementary Figure 7

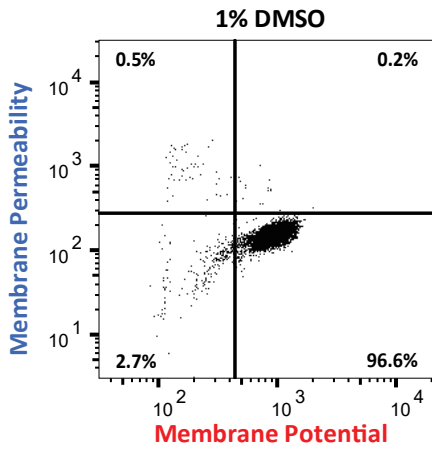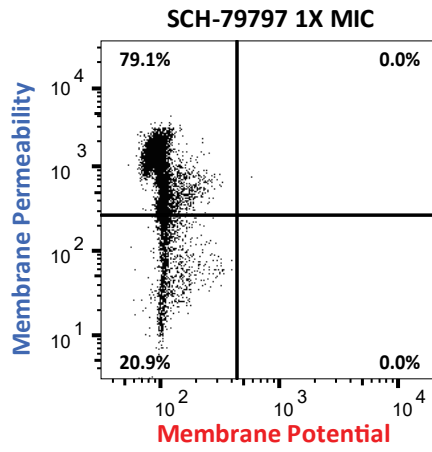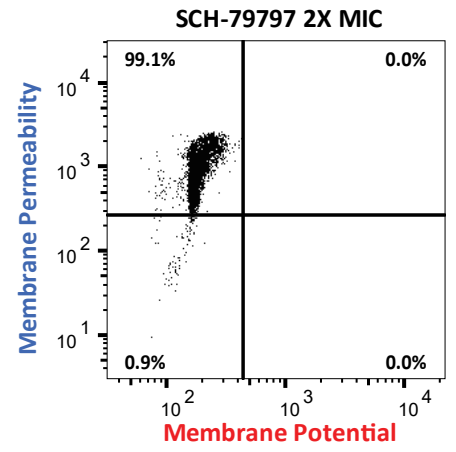

Supplement: Supplementary file [file media-1.pdf]
